# Supplementary material
Source: PubMed Central journal article supplement (PMC2629216)
Supplement: 0810620105_0810620105SI.pdf [file 0810620105_0810620105SI.pdf]

# Supporting Information

Waldron and Springer 10.1073/pnas.0810620105

## SI Text

**Mutant Design.** The design module of Rosetta (1) was used to identify the best rotamer for mutations to each amino acid (except cysteine) at every position in the lectin and EGF domains of P-selectin. This was done for the unbound (PDB ID 1G1Q chain A) and ligand-bound (PDB ID 1G1S chain A) crystal structures (2). Before calculation, missing terminal side chain atoms, or terminal residues missing in chain A, but not other chains in the same coordinate file, were built by using the Swiss PDB Viewer defaults (3). For chain A of 1G1Q, side chain atoms of K17 and residues D159 and D160 were reconstructed. For chain A of 1G1S, side chain atoms of K32, N57, K58, N71, and D158 were reconstructed. These side chains are not near regions of interest in this study. The software defaults chose rotamers that were free of steric clashes. Residue-by-residue energy scores output from Rosetta for the two conformations of P-selectin were compared to identify mutations that would be expected to destabilize the bent, unbound conformation, while not destabilizing the extended conformation.

**Plasmids, Cell Lines, and Protein Purification.** The plasmid used for expression of soluble P-selectin described previously (4) was modified to include the second short consensus repeat and contains mature residues W1 to A281. This modification increased expression roughly 5-fold. We also included a high-affinity streptavidin-binding peptide tag (5). The resulting P-selectin construct in the pIRES2-EGFP vector encoded secretion into cell culture medium of the lectin and EGF domains and the first 2 short consensus repeats of P-selectin fused to a tobacco etch virus protease cleavage site, a 6xHis tag, and a streptavidin-binding peptide. A28H P-selectin is the same protein with the single amino acid change at position 28 from alanine to histidine. Calcium phosphate transient transfections using 50  $\mu\text{g}$  of vector per 15-cm dish of HEK 293S GnTI<sup>-</sup> cells (6) were done in DMEM with 25 mM Hepes (Sigma Aldrich), supplemented with 10% FCS, pen/strep, L-glutamine, and non-essential amino acids. After transfection, media were changed to Opti-MEM serum-free media (Gibco BRL) supplemented with 2 mM L-glutamine. Supernatants were collected 7 days after transfection.

For protein purification, culture supernatant was adjusted to 20 mM Tris, pH 8.0, 100 mM NaCl, 1 mM CaCl<sub>2</sub>, and 0.01% Tween 20 using concentrated stock solutions and filtered. Protein was loaded onto Ni-NTA resin (Qiagen), washed with 20 mM Tris, 100 mM NaCl, 1 mM CaCl<sub>2</sub>, 0.01% Tween 20, pH 8.0, and eluted with 300 mM imidazole. Eluate was loaded onto Strep-tactin resin (IBA) equilibrated in 100 mM Tris, pH 8.0, 150 mM NaCl, 1 mM CaCl<sub>2</sub>, 0.01% Tween 20, washed in the same buffer, and eluted with 2.5 mM *d*-desthiobiotin. The buffer was exchanged to 10 mM Hepes, pH 6.8, 1 mM CaCl<sub>2</sub>. Protein was loaded onto SP-Sepharose and eluted with a gradient of 0–70% 1 M NaCl in the same buffer over 25 column volumes. The major peak was pooled and buffer exchanged to 10 mM Hepes, 150 mM NaCl, 1 mM CaCl<sub>2</sub>, 0.01% Tween 20, pH 7.4. Concentration was determined by using the calculated extinction coefficient (7) of 81,280 M<sup>-1</sup> for P-selectin (wild-type and A28H).

**Yeast Display of P-Selectin.** The yeast display system described by Boder and Witttrup (8) was used to display P-selectin on the yeast cell surface. Plasmid containing the lectin, EGF, and first 2 SCR domains of P-selectin fused to Aga2 was kindly provided by Prof.

Dane Witttrup (Massachusetts Institute of Technology, Cambridge, MA).

Chemically competent yeast [strain EBY100 (8)] were prepared by using the S.c. EasyComp Transformation kit from Invitrogen as described by the manufacturer. Transformation was accomplished according to the manufacturer's protocol. Typically, 1 ml of media (20% glucose, 0.67% Yeast Nitrogen Base, 0.5% Casamino acids, 100 mM sodium phosphate, pH 6.0) was inoculated with a freshly transformed colony and grown at 30 °C with shaking for  $\approx$ 24 h. Galactose was used in place of glucose in the above media to induce protein expression. Growth in galactose at room temperature for  $\approx$ 24 h was performed immediately before use in flow chamber measurements and flow cytometry.

**Flow Cytometry.** Yeast were washed in PBS (Invitrogen; 1 mM KH<sub>2</sub>PO<sub>4</sub>, 3 mM Na<sub>2</sub>HPO<sub>4</sub>, 155 mM NaCl, pH 7.4) + 0.5% BSA, then incubated for 30 min at 30 °C with mouse anti-P-selectin antibodies G3 (anti-lectin domain) or AC1.2 (anti-SCR domains) at a dilution of 1:100 (9, 10). After washing, yeast was incubated for 10 min at 4 °C with phycoerythrin-conjugated goat anti-mouse IgG. Cells were washed a final time before analysis on a FACScan (Becton Dickinson).

**Flow Chamber.** PSGL-1-Fc (40- $\mu\text{l}$  drop at 20  $\mu\text{g}/\text{ml}$  in PBS) provided by Thios Pharmaceuticals was adsorbed onto a plastic Petri dish overnight in a humidified chamber at room temperature. PBS + 1% BSA was used to block the surface for 2 h at room temperature before data collection. Yeast displaying wild-type P-selectin or mutant P-selectin were diluted (100  $\mu\text{l}$  of culture 24 h postinduction) into 1 ml of PBS + 1 mM CaCl<sub>2</sub> and subjected to several subsecond pulses from a needle-tip sonicator to disrupt clusters of yeast cells, resulting in a suspension of single yeast cells. These were further diluted to 10 ml with PBS + 1 mM CaCl<sub>2</sub> and used for flow assays. Cultures were at comparable cell densities postinduction.

An inverted microscope (Nikon Diaphot) with a Pixelink digital camera (model A662C, 1.9 megapixel CMOS) attached to the side C-mount was used with digital capture software from Norpix (Streampix version 3.26). Yeast cells were infused into the flow chamber by using a programmable syringe pump (Harvard Instruments) at 2 dyn/cm<sup>2</sup>, flow was stopped for 30 s before each run, cells were brought into focus, then the shear was increased every 10 s to values of 0.2, 0.4, 0.6, 0.8, 1.0, 1.5, 2.0, 4.0, 6.0, 8.0, 10.0, 12.0, 14.0, 16.0, and 18.0 dyn/cm<sup>2</sup>. Images were captured at a rate of 15 frames per second with a 10 $\times$  objective. Seconds 3 through 9 of each shear were used for data analysis. ImagePro 6.0 was used to process video and track cells. Custom macros were used to open segments of video at a given shear, run filters, and track cells using empirical parameters to identify single yeast cells. ImagePro parameters of roundness (between 1.0 and 1.1), area (between 9 and 85 pixels), and minimum diameter (between 1.9 and 15 pixels) were used to identify individual, nonbudding yeast cells. Track data for all cells were exported to Excel (Microsoft).

Custom Excel macros were used to determine average cell velocity from position over time data and summarize the data for all cells tracked at each shear. Cells traveling above the rate of fluid flow at the wall (determined empirically with uninduced yeast cultures and cultures containing no display plasmid) were excluded from analysis. This is only significant at the lower shear stresses (<0.5 dyn/cm<sup>2</sup>). At higher wall shear stresses, fewer cells
